# Supplementary material
Source: Elsevier journal article supplement (https://www.sciencedirect.com/science/article/pii/S1885585718302500)
Supplement: mmc1 [file S1885585718302500:mmc1.pdf]

## SUPPLEMENTARY MATERIAL

### Table of the supplementary material.

#### Comparison With AMI-ECMO and ENCOURAGE Population

|                                            | AMI-ECMO<br>(n = 145) | ENCOURAGE<br>(n = 138) |
|--------------------------------------------|-----------------------|------------------------|
| Age, y                                     | 66                    | 55                     |
| Male                                       | 110 (76)              | 110 (78)               |
| Hypertension                               | 77 (53)               | 38 (28)                |
| Diabetes mellitus                          | 79 (55)               | 23 (17)                |
| Hyperlipidemia                             | 22 (15)               | 38 (28)                |
| Body mass index, kg/m <sup>2</sup>         | 24 [22-26]            | 26 [24-29]             |
| ST-segment elevation myocardial infarction | 97 (67)               | 123 (89)               |
| Glasgow coma score                         | 15 [3-15]             | 6 [3-14]               |
| Left ventricular ejection fraction, %      | 30 [25-40]            | 20 [15-25]             |
| Lactic acid, mmol/L                        | 5.8 [2.8-10.3]        | 4.1 [2.1-8.2]          |
| Successful revascularization               | 117 (81)              | 99 (72)                |
| Anterior wall infarction                   | 99 (68)               | 93 (67)                |
| Vasopressor                                | 137 (95)              | 138 (100)              |
| Mechanical ventilation                     | 133 (92)              | 134 (97)               |
| Continuous renal replacement therapy       | 47 (32)               | 63 (46)                |
| Limb ischemia                              | 14 (10)               | 15 (11)                |
| Bleeding                                   | 35 (24)               | 17 (12)                |

Values are expressed as median [interquartile range] or No. (%).

ECMO, extracorporeal membrane oxygenation.

**Figure of the supplementary material.** Correlation Among AMI-ECMO, ENCOURAGE, and SAVE Score.

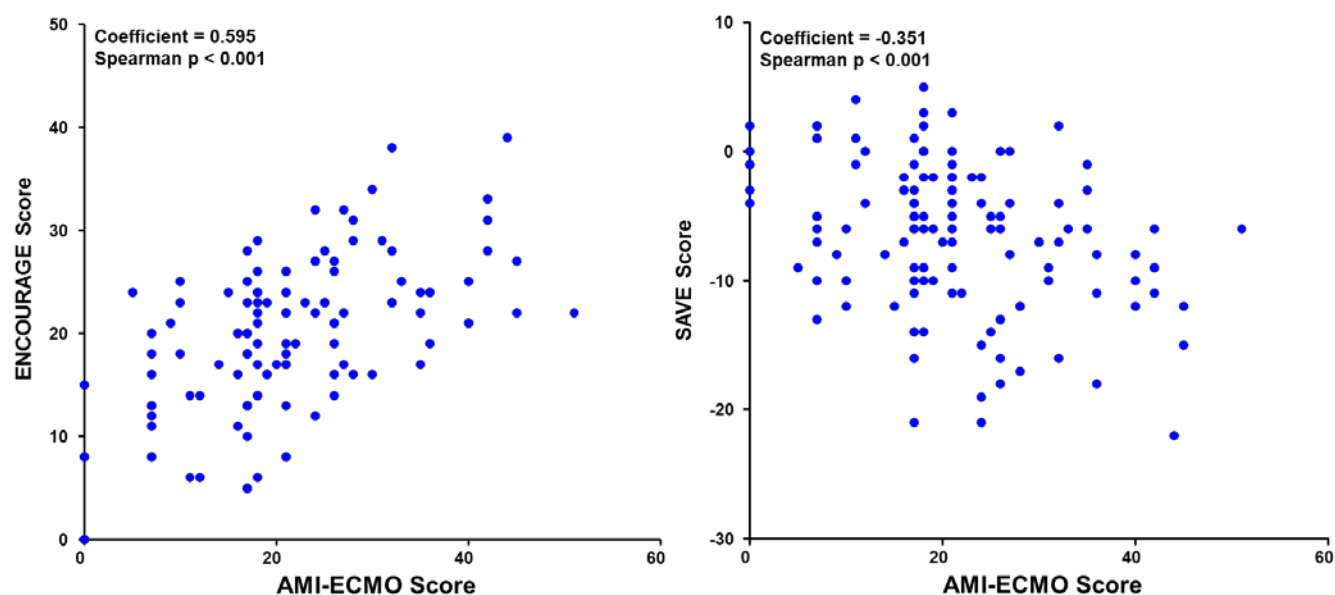

The correlation between AMI-ECMO and ENCOURAGE scores, and between AMI-ECMO and SAVE scores are presented. AMI, acute myocardial infarction; ECMO, extracorporeal membrane oxygenation
